# Supplementary material for: Li3Ge3Se6: the first ternary lithium germanium selenide with interesting∞[Ge6Se12]nchains constructed by ethane-like [Ge2Se6]6−clusters
Source: Royal Society of Chemistry journal article supplement (doi:10.1039/c7dt03781c), 2017-01-01
Supplement: c7dt03781c1.pdf [file c7dt03781c1.pdf]

## **Electronic Supplementary Information (ESI)**

### **Li<sub>3</sub>Ge<sub>3</sub>Se<sub>6</sub>: The First Ternary Lithium Germanium Selenide with Interesting $\infty$ [Ge<sub>6</sub>Se<sub>12</sub>]<sub>n</sub> Chains Constructed by Ethane-like [Ge<sub>2</sub>Se<sub>6</sub>]<sup>6-</sup> Clusters**

Guangmao Li,<sup>a</sup> Ni Zhen, Yu Chu, Zhongxiang Zhou,<sup>a\*</sup>

---

## Electronic Supplementary Information (ESI)

### 1. Tables and Figures

**Table S1.** Crystal data and structure refinements for  $\text{Li}_3\text{Ge}_3\text{Se}_6$ .

**Table S2.** Atomic bond-valence and isotropic displacement parameters for  $\text{Li}_3\text{Ge}_3\text{Se}_6$ .

**Table S3.** Selected bond distances ( $\text{\AA}$ ) and angles (deg) for  $\text{Li}_3\text{Ge}_3\text{Se}_6$ .

**Table S4.** List of ethane-like  $[\text{M}_2\text{Q}_6]^{6-}$  (M= Si, Ge; Q = S, Se, Te) clusters-obtained compounds and their belonging space groups.

**Figure S1.** The converted UV-vis-NIR diffuse reflection spectrum and the inserted diagram is experimental band gap for  $\text{Li}_3\text{Ge}_3\text{Se}_6$ .

**Figure S2.** Comparison of the PXRD spectra measured with samples before and after melting.

### 2. Experimental sections

#### Synthesis

All the substances used are purchased from Shanghai Aladdin biochemistry technology Co., Ltd and listed as follows: Li metal, Ge powder and Se powder. All the reactants have the purities higher than 99.99% and are stored in a glove box filled with dry Ar without oxygen and moisture. The crystal and pure phase sample of  $\text{Li}_3\text{Ge}_3\text{Se}_6$  were synthesized by solid-state reaction with all elementary substances of Li, Ge and Se at a ratio of 1:1:2. The mixture of Li, Ge and Se was weighted and placed into the graphite crucible in the Ar atmosphere, and then sealed into a 10 mm (inner diameter) fused-silica tube with methane-oxygen flame under a high vacuum of  $10^{-3}$  Pa. The tubes were moved into a computer-controlled furnace, heated to 850 °C in 50 h, dwelled there for 30 h, cooled to 650 °C at a rate of 5 °C /h, then rapidly

---

cooled to room temperature at a rate of 10 °C /h.

### **Structural refinement and crystal data**

Experimental single crystals of  $\text{Li}_3\text{Ge}_3\text{Se}_6$  are selected mechanically and fixed on the top of a glass fiber with epoxy for single crystal X-ray crystallography. All above operations was made under a  $40\times$  microscope. All structure data were collected with a Bruker SMART APEX II 4K CCD diffractometer which was equipped with Mo Ka radiation ( $\lambda = 0.71073 \text{ \AA}$ ) operating at 50 kV and 40 mA at 296(2) K. Then the data were refined through full-matrix least-squares on  $F^2$  using SHELXTL program package.<sup>1</sup> Structure determination is based on direct method, and face-indexed absorption correction was made with XPREP Program. The final structure was checked with PLATON<sup>2</sup> and no higher symmetries were provided. Structure parameters in detail are listed in Table S1 and their atomic bond-valence and isotropic displacement parameters are listed in Table S2. Selected bond length and angles are listed in Table S3.

### **Powder X-ray diffraction (PXRD)**

An automated Bruker D2 X-ray diffractometer equipped with a diffracted monochromator set for Cu KR ( $\lambda = 1.5418 \text{ \AA}$ ) radiation was used to measure the XRD. The measurement was performed at 298 K in the angular range of  $2\theta = 10^\circ - 70^\circ$ . The scan step width was  $0.02^\circ$  and the fixed counting time was 1 s/step.

### **Infrared spectrum**

The IR spectrum was recorded on a Shimadzu IRAffinity-1 Fourier transform infrared spectrometer with a resolution of  $2 \text{ cm}^{-1}$  covering the wave number range of  $400 - 4000 \text{ cm}^{-1}$ . The samples used to measure were the mixture of crystals of title compounds and KBr with the ratio of about 1:100. Firstly the mixture was dried and ground into fine powder, and then pressed into a transparent sheet through mechanical method. Finally the sheet was loaded in the sample chamber and then the IR spectrum was measured.

---

### **UV-Vis-NIR diffuse reflectance spectroscopy**

Optical diffuse reflectance spectrum data were collected at 298 K with Shimadzu SolidSpec-3700DUV spectrophotometer. Spectral data cover a wavelength range of 190–2600 nm, which can provide the visible or UV cut-off edge. Besides, the reflectance spectra can be converted to absorbance through Kubelka-Munk function<sup>3</sup>, with which we got the experimental band gaps for title compound.

### **Raman spectroscopy**

The Raman data were collected with a LABRAM HR Evolution spectrometer equipped with a CCD detector using 532 nm radiations from a diode laser on small single crystals, which were selected and loaded on a glass slide. A 50× objective lens was used to choose the area to be measured on the crystal. The beam has a spot size of 35  $\mu\text{m}$  and its maximum power was 60 mW. All the spectrum data collection processes finished in 15 s.

### **Theoretical calculations**

The first principle calculations for the experimental crystal structure were obtained based on *ab initio* calculations implemented in the CASTEP package through density functional theory (DFT).<sup>4</sup> The generalized gradient approximation (GGA) was adopted and Perdew–Burke–Ernzerhof (PBE) functional was chosen to calculate the exchange-correlation potential, with an energy cutoff of 900.0 eV. The  $k$  integration over the Brillouinzone was performed by the tetrahedron method<sup>41</sup> using a Monkhorst–Pack grid of  $4 \times 4 \times 2$ .

Table S1. Crystal data and structure refinements for Li<sub>3</sub>Ge<sub>3</sub>Se<sub>6</sub>.

|                                                         |                                                                 |                |
|---------------------------------------------------------|-----------------------------------------------------------------|----------------|
| Empirical formula                                       | Li <sub>3</sub> Ge <sub>3</sub> Se <sub>6</sub>                 |                |
| Formula weight                                          | 712.35                                                          |                |
| Temperature                                             | 296(2) K                                                        |                |
| Wavelength                                              | 0.71073 Å                                                       |                |
| Crystal system, space group                             | <i>P</i> -1                                                     |                |
| Unit cell dimensions                                    | a = 6.7728(3) Å                                                 | α = 74.519(4)° |
|                                                         | b = 8.6804(5) Å                                                 | β = 76.334(4)° |
|                                                         | c = 10.6300(5) Å                                                | γ = 69.185(4)° |
| Volume                                                  | 555.98(5) Å <sup>3</sup>                                        |                |
| Z, Calculated density                                   | 2, 4.255 kg/m <sup>3</sup>                                      |                |
| Absorption coefficient                                  | 27.629 mm <sup>-1</sup>                                         |                |
| F(000)                                                  | 618                                                             |                |
| Crystal size                                            | 0.248×0.228×0.183 mm <sup>3</sup>                               |                |
| Theta range for data collection                         | 2.56 to 27.53°.                                                 |                |
| Limiting indices                                        | -8 ≤ h ≤ 8, -11 ≤ h ≤ 11, -13 ≤ h ≤ 13                          |                |
| Reflections collected / unique                          | 9499 / 2550 [ <i>R</i> <sub>(int)</sub> = 0.0407]               |                |
| Completeness to theta = 27.53                           | 99.40%                                                          |                |
| Refinement method                                       | Full-matrix least-squares on <i>F</i> <sup>2</sup>              |                |
| Data / restraints / parameters                          | 2550 / 0 / 113                                                  |                |
| Goodness-of-fit on <i>F</i> <sup>2</sup>                | 0.999                                                           |                |
| Final <i>R</i> indices [ <i>I</i> > 2sigma( <i>I</i> )] | <i>R</i> <sub>1</sub> = 0.0265, <i>wR</i> <sub>2</sub> = 0.0471 |                |
| <i>R</i> indices (all data)                             | <i>R</i> <sub>1</sub> = 0.0386, <i>wR</i> <sub>2</sub> = 0.0502 |                |
| Largest diff. peak and hole                             | 0.851 and -0.747 e·Å <sup>-3</sup>                              |                |

<sup>a</sup>*R*<sub>1</sub> =  $F_0 - F_c / F_0$  and *wR*<sub>2</sub> =  $[w(F_0^2 - F_c^2)^2 / wF_0^4]^{1/2}$  for  $F_0^2 > 2\sigma(F_0^2)$ .

Table S2. Atomic bond-valence and isotropic displacement parameters for  $\text{Li}_3\text{Ge}_3\text{Se}_6$ .

| atoms | $x$        | $y$        | $z$         | $\delta_{\text{iso}}$ | BVS   |
|-------|------------|------------|-------------|-----------------------|-------|
| Li1   | 1          | 1          | 0           | 0.034(3)              | 0.635 |
| Li2   | 0.0301(16) | 0.6879(13) | 0.3226(9)   | 0.037(2)              | 0.741 |
| Li3   | 0.5        | 1          | 0.5         | 0.037(3)              | 0.794 |
| Li4   | 0.5123(17) | 0.3509(12) | 0.1913(9)   | 0.038(2)              | 0.710 |
| Ge1   | 0.56771(8) | 0.61650(6) | 0.44715(4)  | 0.014(1)              | 3.871 |
| Ge2   | 0.55315(8) | 0.74147(6) | 0.09507(4)  | 0.014(1)              | 3.975 |
| Ge3   | 0.45759(8) | 0.97254(6) | 0.20559(4)  | 0.014(1)              | 3.979 |
| Se1   | 0.25734(7) | 0.85751(6) | 0.40466(4)  | 0.016(1)              | 1.949 |
| Se2   | 0.77538(8) | 0.52995(6) | 0.24387(4)  | 0.016(1)              | 1.889 |
| Se3   | 0.79862(8) | 0.78454(6) | -0.10436(4) | 0.018(1)              | 1.900 |
| Se4   | 0.74589(8) | 1.01802(6) | 0.24942(5)  | 0.019(1)              | 1.739 |
| Se5   | 0.76359(8) | 0.66601(6) | 0.57205(5)  | 0.019(1)              | 1.696 |
| Se6   | 0.26720(8) | 0.66959(6) | 0.07830(5)  | 0.019(1)              | 1.727 |

Table S3. Selected bond distances (Å) and angles (°) for Li<sub>3</sub>Ge<sub>3</sub>Se<sub>6</sub>.

|                       |            |                       |            |
|-----------------------|------------|-----------------------|------------|
| Li(1)-Se(4)#7         | 2.8089(5)  | Se(6)-Li(2)-Se(1)     | 97.0(3)    |
| Li(1)-Se(6)#2         | 2.8182(5)  | Se(5)#6-Li(2)-Se(1)   | 91.4(3)    |
| Li(1)-Se(6)#1         | 2.8182(5)  | Se(4)#6-Li(2)-Se(1)   | 84.2(3)    |
| Li(2)-Se(5)#6         | 2.835(10)  | Se(6)-Li(2)-Se(5)#4   | 92.6(3)    |
| Li(2)-Se(4)#6         | 2.850(10)  | Se(5)#6-Li(2)-Se(5)#4 | 82.5(2)    |
| Li(2)-Se(5)#4         | 2.915(10)  | Se(4)#6-Li(2)-Se(5)#4 | 167.6(4)   |
| Li(2)-Se(2)#6         | 2.921(10)  | Se(1)-Li(2)-Se(5)#4   | 103.3(3)   |
| Li(3)-Se(4)#8         | 2.7856(5)  | Se(6)-Li(2)-Se(2)#6   | 85.2(3)    |
| Li(3)-Se(5)#8         | 2.8215(5)  | Se(5)#6-Li(2)-Se(2)#6 | 86.5(3)    |
| Li(3)-Se(1)#8         | 2.8564(5)  | Se(4)#6-Li(2)-Se(2)#6 | 93.0(3)    |
| Li(4)-Se(4)#9         | 2.737(10)  | Se(1)-Li(2)-Se(2)#6   | 176.6(4)   |
| Li(4)-Se(5)#4         | 2.760(10)  | Se(5)#4-Li(2)-Se(2)#6 | 79.1(3)    |
| Li(4)-Se(6)#3         | 2.922(10)  | Se(4)#8-Li(3)-Se(4)   | 180        |
| Li(4)-Se(3)#3         | 3.151(11)  | Se(4)#8-Li(3)-Se(5)#8 | 89.023(15) |
| Ge(1)-Se(5)           | 2.2912(7)  | Se(4)-Li(3)-Se(5)#8   | 90.977(15) |
| Ge(1)-Ge(1)#4         | 2.4109(10) | Se(4)#8-Li(3)-Se(5)   | 90.977(15) |
| Ge(2)-Se(6)           | 2.2920(7)  | Se(4)-Li(3)-Se(5)     | 89.023(15) |
| Ge(2)-Ge(3)           | 2.4080(7)  | Se(5)#8-Li(3)-Se(5)   | 180.000(1) |
| Ge(3)-Se(3)#2         | 2.3845(7)  | Se(4)#8-Li(3)-Se(1)#8 | 86.987(14) |
| Se(1)-Ge(3)           | 2.4068(7)  | Se(4)-Li(3)-Se(1)#8   | 93.013(14) |
| Se(1)-Ge(1)           | 2.4121(7)  | Se(5)#8-Li(3)-Se(1)#8 | 85.796(14) |
| Se(1)-Li(3)           | 2.8564(5)  | Se(5)-Li(3)-Se(1)#8   | 94.204(14) |
| Se(1)-Li(2)           | 2.868(10)  | Se(4)#8-Li(3)-Se(1)   | 93.013(14) |
| Se(2)-Ge(2)           | 2.3977(6)  | Se(4)-Li(3)-Se(1)     | 86.987(14) |
| Se(2)-Ge(1)           | 2.4272(7)  | Se(5)#8-Li(3)-Se(1)   | 94.204(14) |
| Se(2)-Li(2)#1         | 2.921(10)  | Se(5)-Li(3)-Se(1)     | 85.796(14) |
| Se(2)-Li(4)           | 2.967(11)  | Se(1)#8-Li(3)-Se(1)   | 180        |
| Se(3)-Ge(3)#2         | 2.3845(7)  | Se(4)#9-Li(4)-Se(5)#4 | 93.3(3)    |
| Se(3)-Ge(2)           | 2.3982(7)  | Se(4)#9-Li(4)-Se(6)   | 166.4(4)   |
| Se(3)-Li(4)#3         | 3.151(11)  | Se(5)#4-Li(4)-Se(6)   | 94.7(3)    |
| Se(4)-Ge(3)           | 2.2938(7)  | Se(4)#9-Li(4)-Se(6)#3 | 84.3(3)    |
| Se(4)-Li(4)#5         | 2.737(10)  | Se(5)#4-Li(4)-Se(6)#3 | 165.0(4)   |
| Se(4)-Li(3)           | 2.7856(5)  | Se(6)-Li(4)-Se(6)#3   | 85.2(2)    |
| Se(4)-Li(1)           | 2.8089(5)  | Se(4)#9-Li(4)-Se(2)   | 104.2(3)   |
| Se(4)-Li(2)#1         | 2.850(10)  | Se(5)#4-Li(4)-Se(2)   | 100.1(3)   |
| Se(5)-Li(4)#4         | 2.760(10)  | Se(6)-Li(4)-Se(2)     | 85.2(3)    |
| Se(5)-Li(3)           | 2.8215(5)  | Se(6)#3-Li(4)-Se(2)   | 94.8(3)    |
| Se(5)-Li(2)#1         | 2.835(10)  | Se(4)#9-Li(4)-Se(3)#3 | 84.3(3)    |
| Se(5)-Li(2)#4         | 2.915(10)  | Se(5)#4-Li(4)-Se(3)#3 | 82.9(3)    |
| Se(6)-Li(2)           | 2.724(10)  | Se(6)-Li(4)-Se(3)#3   | 85.9(3)    |
| Se(6)-Li(4)           | 2.785(9)   | Se(6)#3-Li(4)-Se(3)#3 | 82.1(3)    |
| Se(6)-Li(1)#6         | 2.8182(5)  | Se(2)-Li(4)-Se(3)#3   | 170.7(3)   |
| Se(6)-Li(4)#3         | 2.922(10)  | Se(1)-Ge(1)-Se(2)     | 111.43(2)  |
| Se(4)#7-Li(1)-Se(4)   | 180        | Se(5)-Ge(1)-Se(2)     | 113.48(3)  |
| Se(4)#7-Li(1)-Se(6)#2 | 95.085(15) | Se(5)-Ge(1)-Se(1)     | 110.50(3)  |
| Se(4)-Li(1)-Se(6)#2   | 84.915(15) | Se(6)-Ge(2)-Se(2)     | 112.29(3)  |

---

|                       |             |                     |           |
|-----------------------|-------------|---------------------|-----------|
| Se(4)#7-Li(1)-Se(6)#1 | 84.915(15)  | Se(6)-Ge(2)-Se(3)   | 116.65(3) |
| Se(4)-Li(1)-Se(6)#1   | 95.085(15)  | Se(2)-Ge(2)-Se(3)   | 103.66(2) |
| Se(6)#2-Li(1)-Se(6)#1 | 180.000(19) | Se(4)-Ge(3)-Se(3)#2 | 115.75(3) |
| Se(6)-Li(2)-Se(5)#6   | 171.1(4)    | Se(4)-Ge(3)-Se(1)   | 111.39(2) |
| Se(6)-Li(2)-Se(4)#6   | 96.3(3)     | Se(3)#2-Ge(3)-Se(1) | 104.89(2) |
| Se(5)#6-Li(2)-Se(4)#6 | 87.5(3)     |                     |           |

---

Symmetry transformations used to generate equivalent atoms:

#1  $x+1, y, z$     #2  $-x+1, -y+2, -z$     #3  $-x+1, -y+1, -z$     #4  $-x+1, -y+1, -z+1$   
#5  $x, y+1, z$     #6  $x-1, y, z$     #7  $-x+2, -y+2, -z$     #8  $-x+1, -y+2, -z+1$   
#9  $x, y-1, z$



Table S4. List of ethane-like  $[M_2Q_6]^{6-}$  (M= Si, Ge; Q = S, Se, Te) clusters-obtained compounds and their belonging space groups.

| NO. | Formula                                                                         | Space Group             | NO. | Formula                                                                         | Space Group |
|-----|---------------------------------------------------------------------------------|-------------------------|-----|---------------------------------------------------------------------------------|-------------|
| 1   | Na <sub>4</sub> Si <sub>4</sub> Se <sub>10</sub>                                | <i>P2<sub>1</sub>/c</i> | 17  | Na <sub>8</sub> Eu <sub>2</sub> (Ge <sub>2</sub> Se <sub>6</sub> ) <sub>2</sub> | <i>C2/m</i> |
| 2   | K <sub>6</sub> Sn <sub>2</sub> Te <sub>6</sub>                                  | <i>P2<sub>1</sub>/c</i> | 18  | Na <sub>8</sub> Eu <sub>2</sub> (Ge <sub>2</sub> Te <sub>6</sub> ) <sub>2</sub> | <i>C2/m</i> |
| 3   | Na <sub>6</sub> Ge <sub>2</sub> Se <sub>6</sub>                                 | <i>P2<sub>1</sub>/c</i> | 19  | Na <sub>9</sub> Sm(Si <sub>2</sub> Se <sub>6</sub> ) <sub>2</sub>               | <i>C2/m</i> |
| 4   | Na <sub>6</sub> Ge <sub>2</sub> Te <sub>6</sub>                                 | <i>P2<sub>1</sub>/c</i> | 20  | Na <sub>9</sub> Sm(Ge <sub>2</sub> Se <sub>6</sub> ) <sub>2</sub>               | <i>C2/m</i> |
| 5   | K <sub>6</sub> Si <sub>2</sub> Te <sub>6</sub>                                  | <i>C2/c</i>             | 21  | Na <sub>9</sub> La(Ge <sub>2</sub> Se <sub>6</sub> ) <sub>2</sub>               | <i>C2/m</i> |
| 6   | K <sub>6</sub> Ge <sub>2</sub> Te <sub>6</sub>                                  | <i>C2/c</i>             | 22  | Na <sub>4</sub> MgSi <sub>2</sub> Se <sub>6</sub>                               | <i>C2</i>   |
| 7   | Na <sub>9</sub> Sb(Ge <sub>2</sub> Se <sub>6</sub> ) <sub>2</sub>               | <i>C2/c</i>             | 23  | Na <sub>4</sub> MgGe <sub>2</sub> Se <sub>6</sub>                               | <i>C2</i>   |
| 8   | K <sub>6</sub> Ge <sub>2</sub> S <sub>6</sub>                                   | <i>C2/m</i>             | 24  | Na <sub>8</sub> Ge <sub>4</sub> Se <sub>10</sub>                                | <i>P-1</i>  |
| 9   | K <sub>6</sub> Ge <sub>2</sub> Se <sub>6</sub>                                  | <i>C2/m</i>             | 25  | Al <sub>2</sub> Si <sub>2</sub> Te <sub>6</sub>                                 | <i>P-3</i>  |
| 10  | Na <sub>9</sub> Sb(Ge <sub>2</sub> S <sub>6</sub> ) <sub>2</sub>                | <i>C2/m</i>             | 26  | In <sub>2</sub> Si <sub>2</sub> Te <sub>6</sub>                                 | <i>P-3</i>  |
| 11  | Na <sub>8</sub> Pb <sub>2</sub> [Ge <sub>2</sub> S <sub>6</sub> ] <sub>2</sub>  | <i>C2/m</i>             | 27  | Cr <sub>2</sub> Si <sub>2</sub> Te <sub>6</sub>                                 | <i>R-3h</i> |
| 12  | Na <sub>8</sub> Sn <sub>2</sub> [Ge <sub>2</sub> S <sub>6</sub> ] <sub>2</sub>  | <i>C2/m</i>             | 28  | Cr <sub>2</sub> Ge <sub>2</sub> Te <sub>6</sub>                                 | <i>R-3h</i> |
| 13  | Na <sub>8</sub> Pb <sub>2</sub> [Ge <sub>2</sub> Se <sub>6</sub> ] <sub>2</sub> | <i>C2/m</i>             | 29  | Sc <sub>2</sub> Si <sub>2</sub> Te <sub>6</sub>                                 | none        |
| 14  | Na <sub>8</sub> Pb <sub>2</sub> [Si <sub>2</sub> Se <sub>6</sub> ] <sub>2</sub> | <i>C2/m</i>             | 30  | Na <sub>6</sub> Si <sub>2</sub> S <sub>6</sub>                                  | none        |
| 15  | Na <sub>8</sub> Pb <sub>2</sub> [Ge <sub>2</sub> Se <sub>6</sub> ] <sub>2</sub> | <i>C2/m</i>             | 31  | Na <sub>6</sub> Si <sub>2</sub> Se <sub>6</sub>                                 | none        |
| 16  | Na <sub>8</sub> Eu <sub>2</sub> (Si <sub>2</sub> Se <sub>6</sub> ) <sub>2</sub> | <i>C2/m</i>             |     |                                                                                 |             |

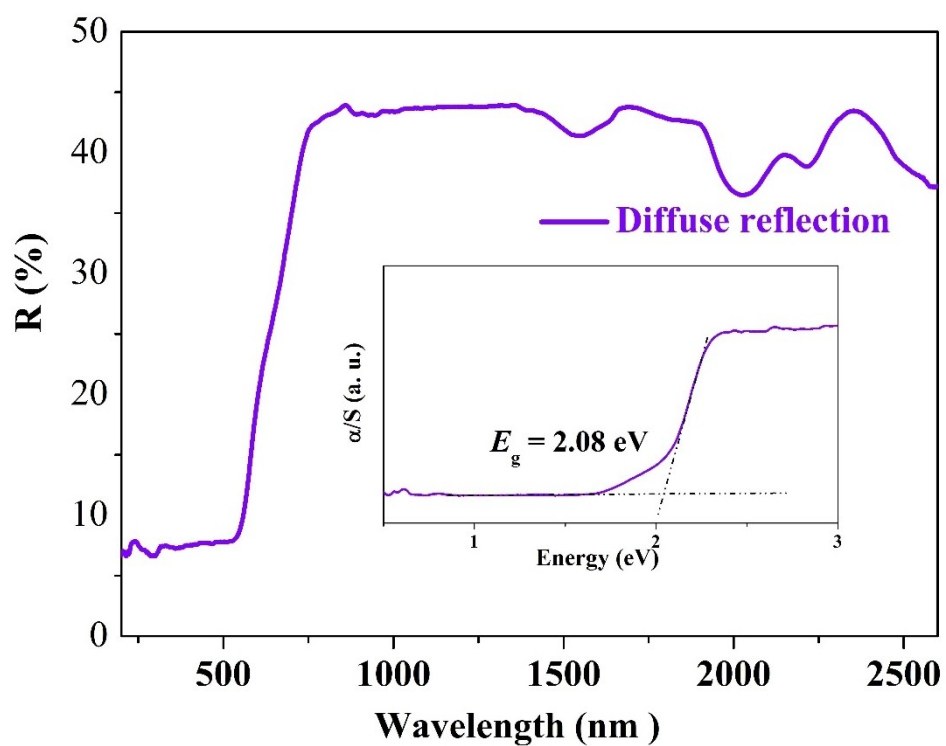

Figure S1. The converted UV-vis-NIR diffuse reflection spectrum and the inserted diagram is experimental band gap for  $\text{Li}_3\text{Ge}_3\text{Se}_6$ .

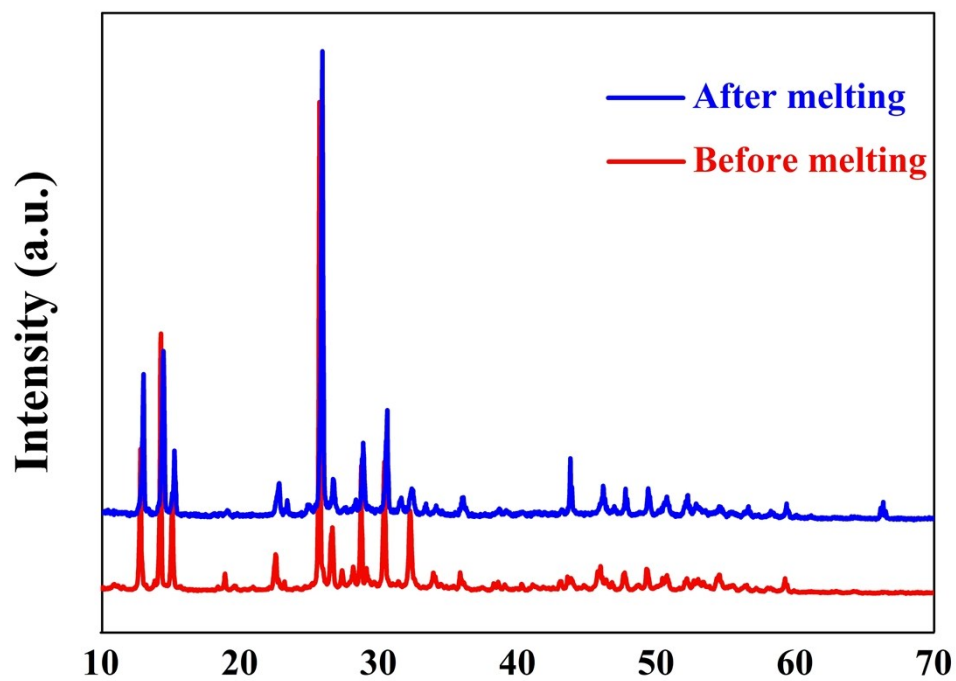

Figure 2. Comparison of PXRD spectra between samples before and after melting.

---

## Reference

- (1) Sheldrick, G. M. *SHELXTL, Bruker Analytical X-ray Instruments, Inc.* Madison, WI, **2008**.
- (2) Spek, A. L. *J. Appl. Crystallogr.* 2003, **36**, 7-13.
- (3) Kortüm, G. *Reflectance Spectroscopy*. Springer Verlag, New York, 1969.
- (4) Clark, S. J.; Segall, M. D.; Pickard, C. J.; Hasnip, P. J.; Probert, M. J.; Refson, K.; Payne, M. C. *Z. Kristallogr.* 2005, **220**, 567-570.
